# Supplementary material for: Atomic and electronic aspects of the coloration mechanism of gasochromic Pt/Mo-modified V2O5 smart films: an in situ X-ray spectroscopic study
Source: Royal Society of Chemistry journal article supplement (doi:10.1039/c5cp06870c), 2016-01-01
Supplement: c5cp06870c1.pdf [file c5cp06870c1.pdf]

## Supporting Information

### **Atomic and electronic aspects of coloration mechanism of gasochromic Pt/Mo-modified V<sub>2</sub>O<sub>5</sub> smart film: an in situ x-ray spectroscopic study**

Ying-Rui Lu<sup>1,2,3</sup>, Hsin-Hua Hsu<sup>2</sup>, Jeng-Lung Chen<sup>3</sup>, Han-Wei Chang<sup>3</sup>, Chi-Liang  
Chen<sup>3</sup>, Wu-Ching Chou<sup>4</sup> and Chung-Li Dong<sup>1,\*</sup>

<sup>1</sup> Department of Physics, Tamkang University, New Taipei 25137, Taiwan

<sup>2</sup> Program for Science and Technology of Accelerator Light Source, National Chiao  
Tung University, Hsinchu 30010, Taiwan

<sup>3</sup> National Synchrotron Radiation Research Center, Hsinchu 30076, Taiwan

<sup>4</sup> Department of Electrophysics, National Chiao Tung University, Hsinchu 30010,  
Taiwan

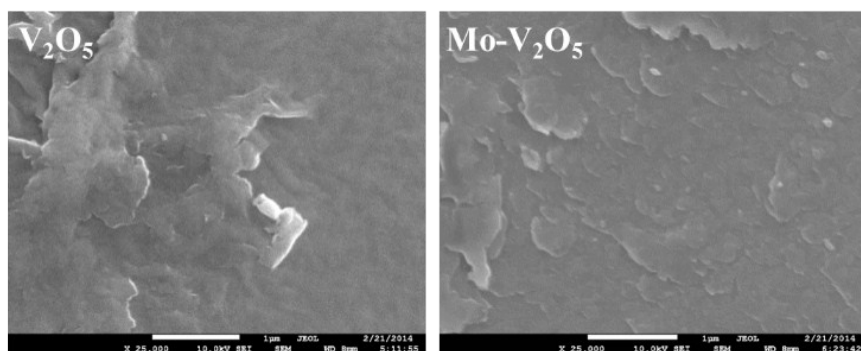

**Figure S1.** SEM of gasochromic  $V_2O_5$  and  $Mo-V_2O_5$  thin films.

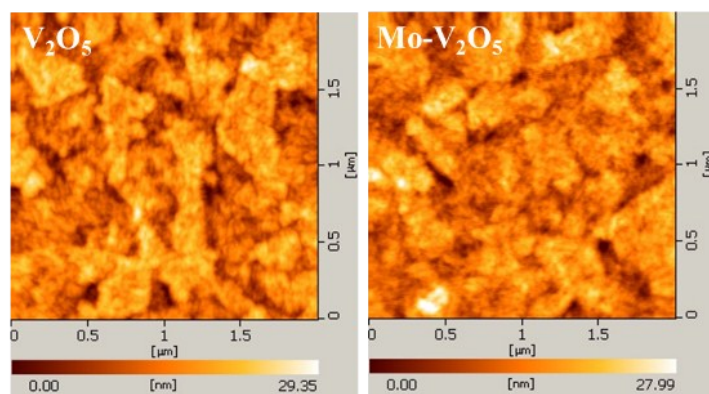

**Figure S2.** AFM images of  $V_2O_5$  and  $Mo-V_2O_5$  thin films.

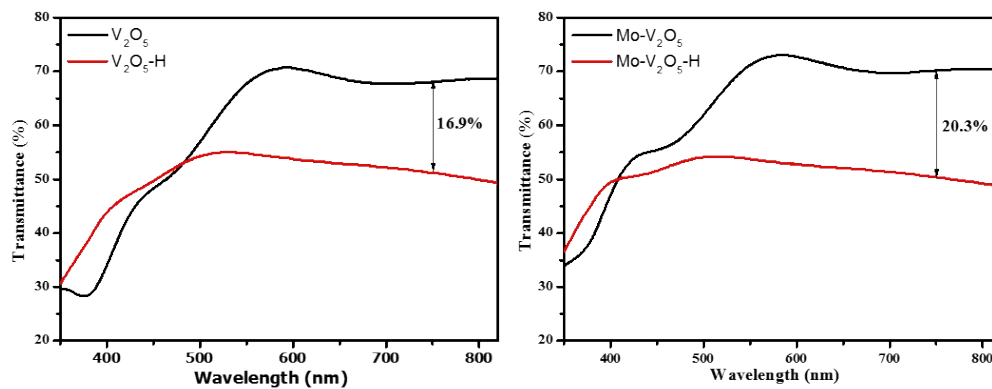

**Figure S3.** Spectral transmittance of  $V_2O_5$  and  $Mo-V_2O_5$  in colored and bleach states.
